# Supplementary material for: Core-composite mediated separation of diverse nanoparticles to purity
Source: Royal Society of Chemistry journal article supplement (doi:10.1039/c9sm01571j), 2019-01-01
Supplement: c9sm01571j1.pdf [file c9sm01571j1.pdf]

**-Supporting Information-**

1  
2  
3  
4  
5  
6  
7  
8  
9  
10  
11  
12  
13  
14  
15  
16  
17  
18  
19  
20  
21  
22  
23  
24  
25  
26  
27  
28  
29  
30  
31  
32  
33  
34  
35  
36

**Core-composite mediated separation of diverse nanoparticles to purity**

**Chandra S. Bhatt<sup>a</sup>, Bharathkumar Nagaraj<sup>b</sup>, Deepanjan Ghosh<sup>c</sup>, Sureshkumar Ramasamy<sup>c</sup>, Ranjit Thapa<sup>d</sup>, Sreekar B. Marpu<sup>a</sup> and Anil K. Suresh<sup>\*,a</sup>**

*<sup>a</sup>Bio-Nanotechnology Laboratory, Department of Biotechnology and <sup>d</sup>Department of Physics, SRM University-AP, Amaravati-522502, India.*

*<sup>b</sup>Department of Biotechnology, Faculty of Science and Humanities, SRMIST, Kattankulathur, Chennai 603203, India.*

*<sup>c</sup>Biochemical Sciences Division, National Chemical Laboratory, Pashan Road, Pune 411008, India.*

*<sup>e</sup>Department of Chemistry, University of North Texas, Denton, TX 76201, USA.*

**Address Correspondence to** Anil K. Suresh, e-mail: [anil.s@srmap.edu.in](mailto:anil.s@srmap.edu.in)

## 37 **Detailed synthesis of various monodispersed nanoparticles used in our studies**

38

### 39 **1. Synthesis of Monodispersed Gold Nanospheres (AuNPs)**

40 For the synthesis of monodispersed gold nanoparticles, briefly, 750  $\mu\text{L}$  of trisodium citrate (25.7 mM)  
41 was added to the boiling 50 mL of  $\text{HAuCl}_4^{4-}$  (294.3  $\mu\text{M}$ ). Transformation of colour from light blue to  
42 red, and within two minutes indicating the formation of Au nanospheres.

### 43 **2. Synthesis of monodispersed Silver Nanospheres (AgNPs)**

44 Briefly, 45 mL of solution containing  $\text{NaBH}_4$  (1 mM) and trisodium citrate (3.55 mM) were heated to  
45 60  $^\circ\text{C}$  for 30 minutes under dark with vigorous stirring, followed by dropwise addition of 5 mL of  
46  $\text{AgNO}_3$  (4 mM) and subsequently raising the temperature to 90  $^\circ\text{C}$ . After attainment of the temperature  
47 to 90  $^\circ\text{C}$ , pH of the solution was adjusted to 10.5 using  $\text{NaOH}$  (0.1 M), and continually heated further for  
48 20 min until colour changes to yellow.

### 49 **3. Synthesis of monodispersed Platinum Nanospheres (PtNPs)**

50 Initially, platinum seeds of 5 nm diameter were prepared by adding 18 mL of 0.2% solution of  $\text{HPtCl}_4^{4-}$   
51 to 232 mL of boiling water. Within a minute, 5.5 mL solution of 1% SC and 0.05% CA was added,  
52 followed by 30 sec interval. Quickly 2.77 mL of 0.08%  $\text{NaBH}_4$  was injected. The seed solution was  
53 heated for 10 min, later cooled to room temperature. Finally,  $25 \pm 5$  nm platinum nanospheres were  
54 prepared by adding 1 mL platinum seed solution to 29 mL of water, followed by addition of 45  $\mu\text{L}$  of  
55  $\text{HPtCl}_4^{4-}$  (0.4 M) and 0.5 mL of solution containing 1% sodium citrate and 1.25% ascorbic acid under  
56 stirring. Temperature was slowly raised to boiling at the rate of 10  $^\circ\text{C}/\text{min}$ .

57

58

59

60

61

62

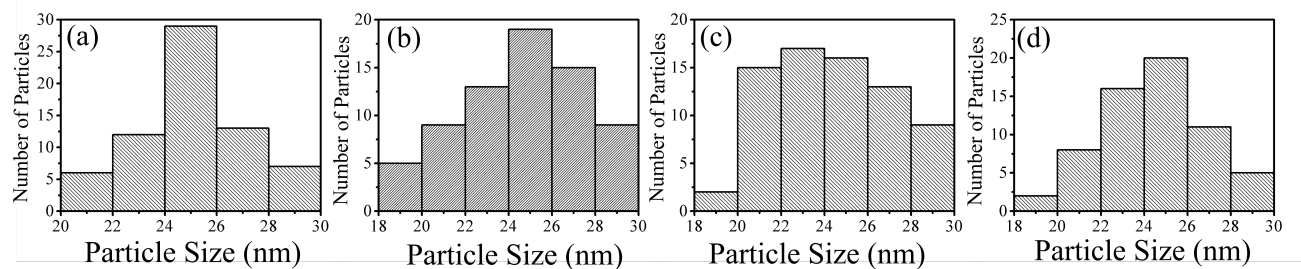

63

64 **Figure S1.** Histogram size distributions calculated by counting ~70 particles from various TEM images  
65 for the various cores of nanoparticles used in our studies. (a) IONPs (b) AgNPs (c) AuNPs and (d)  
66 PtNPs. Average size distribution of all the nanoparticles is  $25 \pm 5$  nm.

67

68

69

70

71

72

73

74

75

76

77

78

79

80

81

82

83

84

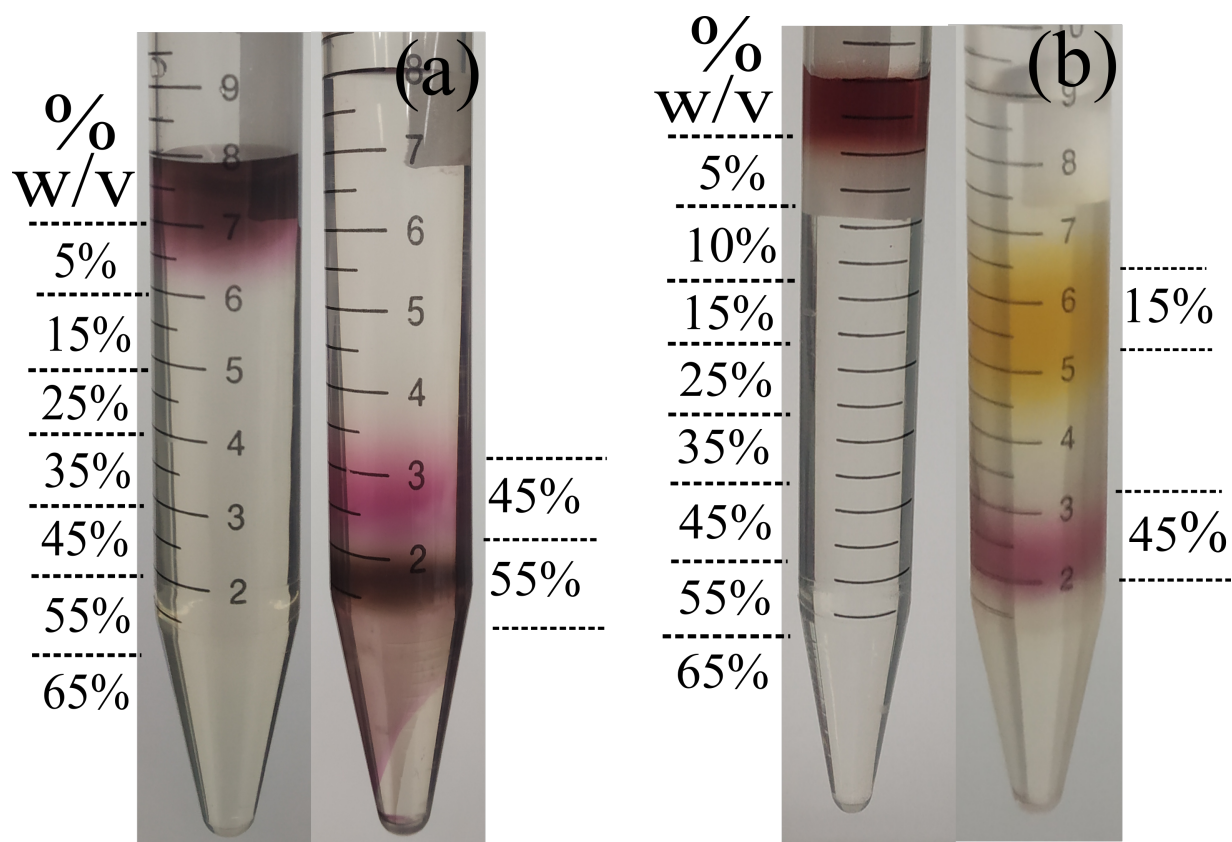

85

86

87 **Figure S2.** Separation of dual core-compositions of combinations; AuNPs *plus* PtNPs and IONPs *plus*  
88 AuNPs before and after separation. (a) Photograph of the mixed parent AuNPs *plus* PtNPs showing dark  
89 grey color before (left) and after (right) separation showing two distinctive colored bands for the  
90 representative nanoparticle. (b) Photograph of the mixed parent IONPs *plus* NPs showing brown color  
91 before (left) and after (right) separation showing two colored distinctive bands for the separated  
92 nanoparticles.

93

94

95

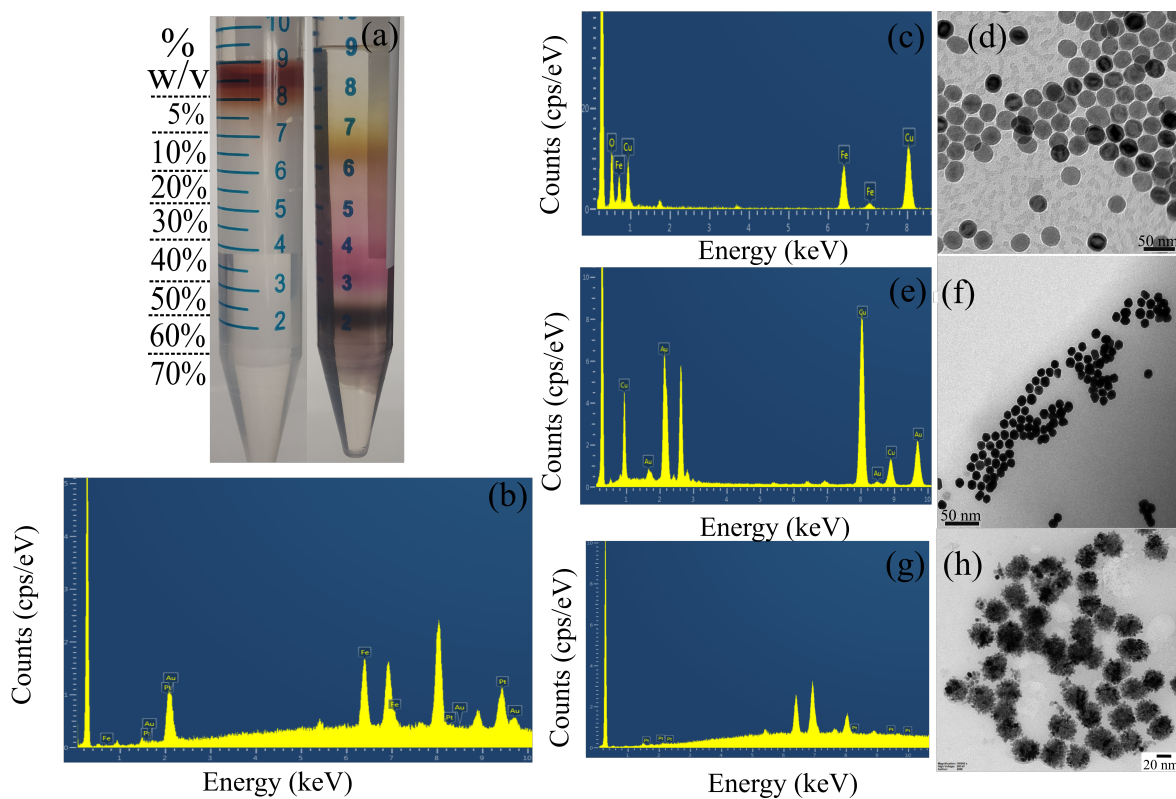

97

98

99 **Figure S3.** Characterization of triplicate core-compositions of iron oxide *plus* gold *plus* platinum  
 100 nanoparticles before and after separation. (a) Photograph of the mixed nanoparticle showing dark brown  
 101 color before (left) and after (right) separation showing two distinctive colored bands for the  
 102 representative nanoparticle. (a). (b) EDS of the parent nanoparticles showing strong signals from  
 103 IONPs, AuNPs and PtNPs. (c, e, g) EDS of the purified IONPs, AgNPs and PtNPs showing strong  
 104 independent signals. (d, f, h) Are TEM images of the purified IONPs, AuNPs and PtNPs.

105

106

107

108

109

110

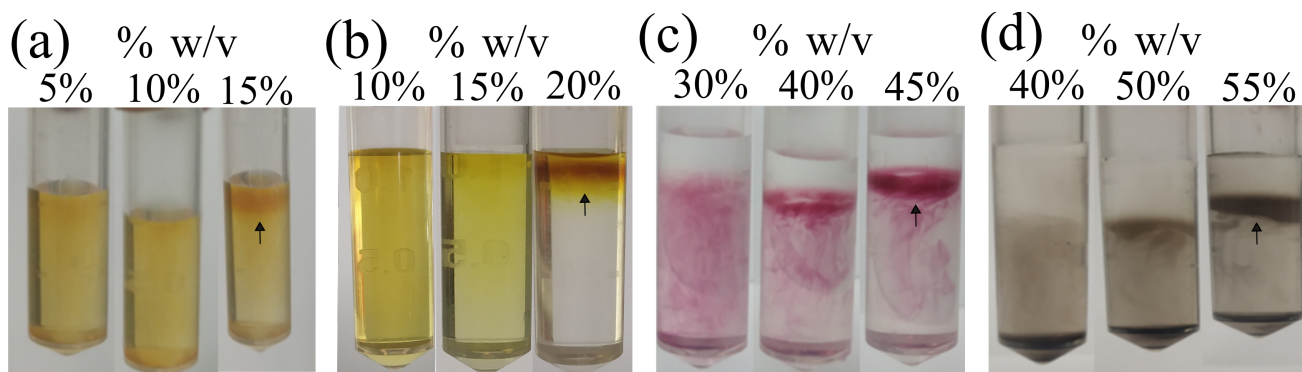

111

112 Optical photograph images of the various nanoparticles used in our studies showing the centrifuged  
113 sample at different percent gradients to determine the impedance gradient. (a) IONPs (b) AgNPs (c)  
114 AuNPs and (d) PtNPs. The impedance gradients were determined to be 15%, 20%, 45% and 55% for  
115 IONPs, AgNPs, AuNPs and PtNPs respectively, indicated using arrows.

116

117

118

119

120

121

122

123

124

125

126

127

128

129

130

131

132

133

134

135

136

137

138

139

140

141

142  
143  
144  
145  
146

**Table S1. Density of the metal nanoparticles that are used in our studies for separation.**

| <b>Metals</b> | <b>Density<br/>(<math>\rho</math>) kg/m<sup>3</sup></b> |
|---------------|---------------------------------------------------------|
| Platinum      | 21400                                                   |
| Gold          | 19320                                                   |
| Silver        | 10490                                                   |
| Iron          | 7850                                                    |

147  
148  
149  
150  
151

**Table S2. Viscosities and densities of the sucrose at various percent gradients.**

| <b>% Sucrose<br/>(w/v)</b> | <b>Viscosity (<math>\mu</math>)<br/>kg/m<sup>3</sup></b> | <b>Density (<math>\rho</math>)<br/>kg/l<sup>3</sup></b> |
|----------------------------|----------------------------------------------------------|---------------------------------------------------------|
| 0                          | 1000                                                     | 0.998                                                   |
| 5                          | 1144                                                     | 1.018                                                   |
| 10                         | 1333                                                     | 1.038                                                   |
| 15                         | 1589                                                     | 1.059                                                   |
| 20                         | 1941                                                     | 1.081                                                   |
| 25                         | 2442                                                     | 1.104                                                   |
| 30                         | 3181                                                     | 1.127                                                   |
| 35                         | 4314                                                     | 1.151                                                   |
| 40                         | 6150                                                     | 1.176                                                   |
| 45                         | 9360                                                     | 1.203                                                   |
| 50                         | 15400                                                    | 1.230                                                   |
| 55                         | 28002                                                    | 1.258                                                   |
| 60                         | 58037                                                    | 1.286                                                   |
| 65                         | 146090                                                   | 1.316                                                   |
| 70                         | 480060                                                   | 1.347                                                   |
| 75                         | 2323000                                                  | 1.379                                                   |

152  
153  
154  
155  
156  
157
